# Supplementary material
Source: publisher figshare collection journal article supplement (https://karger.figshare.com/ndownloader/files/24689168)
Supplement: Supplementary file 1 [file 24689168]

Manuscript: CRE-2020-1-19/R2 RESUBMISSION - Erosive tooth wear among adults in Lithuania: a cross-sectional national oral health study

Supplementary material

Table 1. Operationalization of variables for statistical analyses.

| Variable | Measurement | | Categorization for statistical analysis |
| --- | --- | --- | --- |
| **Socio-demographic characteristics** | | | |
| **Education** | *“What level of education have you completed?”*  *1 No formal schooling*  *2 Less than primary school*  *3 Primary school completed*  *4 Secondary school completed*  *5 College less than 4 years*  *6 College 4 years*  *7 Master’s degree* | | *1 Secondary school or less*  *2 College less than 4 years*  *3 College 4 years or more* |
| **Residency** | *“Location”*  *1 Urban*  *2 Peri-urban*  *3 Rural* | | *1 Peri-urban/rural*  *2 Urban* |
| **F levels in drinking water** | *Recorded from the water supply company* | | *Cut-off point – recommended level for artificial water fluoridation*  *1 Less or equal 1 ppm*  *2 More than 1 ppm* |
| **Age** | *“How old are you?”* | *Continuous, per 10 years* | |
| **Oral health behaviour** |  | |  |
| **Tooth brushing frequency** | *“How often do you clean your teeth”?*  *1 Never*  *2 Once a month*  *3 2-3 times a month*  *4 Once a week*  *5 2-6 times a week*  *6 Once a day*  *7 Twice or more a day* | | *1 Twice or more a day*  *2 Once a day or less* |
| **Using fluoridated toothpaste** | *“Do you use a toothpaste that contains fluoride?” 1 Yes*  *2 No*  *9 I do not know* | | *1 No*  *2 Yes* |
| **Diet** |  | |  |
| **Fruit**  **Juice**  **Soft drinks** | *“How often do you eat or drink any of the following foods or drinks, even in small quantities?”*  *1 Seldom/never*  *2 Several times a month*  *3 Once a week*  *4 Several times a week*  *5 Every day*  *6 Several times a day* | | *1 Once or more every day*  *2 Several times a week or less* |
| **Oral health** |  | |  |
| **Past dental caries experience** | *D3MFS clinically detected based on WHO methods* | | *Cut-off point – mean value in the study sample*  *1 D3MFS more than 77*  *2 D3MFS 77 or less* |
| **Fluorosis** | *Clinically detected based on WHO criteria* | | *1 Yes (very mild, mild, moderate, severe)*  *2 No* |
| **General health** |  | |  |
| **Chronic diseases**  **Reflux** | *“Do you have a general practitioner confirmed chronic diseases? If yes, please, specify.”* | | *1 Yes*  *2 No* |
| **Dry mouth** | *“How often do you have dry mouth?”*  *1 Never*  *2 Sometimes*  *3 Often*  *4 Always* | | *1 Sometimes/often/always*  *2 Never* |
